# Supplementary material for: How sweet is your love? Disentangling the role of marital status and quality on average glycemic levels among adults 50 years and older in the English Longitudinal Study of Ageing
Source: PubMed Central journal article supplement (PMC9930545; doi:10.1136/bmjdrc-2022-003080), 2023-01-03
Supplement: bmjdrc-2022-003080supp001.pdf [file bmjdrc-2022-003080supp001.pdf]

\*\*\*MAIN ANALYSIS\*\*\*

```
local func = "typ"
```

```
foreach x of local func {
```

```
xtreg hba1c `x'sps age, fe i(idauniq)
```

```
    est store model_1_`x'
```

```
    matrix table = r(table)
```

```
    matrix list table
```

```
    putexcel C3=(_b[`x'sps]) using "MarR1.xlsx", sheet("`x'") modify
```

```
    putexcel C4=(table[5,1]) using "MarR1.xlsx", sheet("`x'") modify
```

```
    putexcel E4=(table[6,1]) using "MarR1.xlsx", sheet("`x'") modify
```

```
xtreg hba1c `x'sps age income work bmi depress phyact smoke, fe i(idauniq)
```

```
    est store model_2_`x'
```

```
    matrix table = r(table)
```

```
    matrix list table
```

```
    putexcel H3=(_b[`x'sps]) using "MarR1.xlsx", sheet("`x'") modify
```

```
    putexcel H4=(table[5,1]) using "MarR1.xlsx", sheet("`x'") modify
```

```
    putexcel J4=(table[6,1]) using "MarR1.xlsx", sheet("`x'") modify
```

```
xtreg hba1c `x'sps typfam typfrd typchd age income work bmi depress phyact smoke, fe i(idauniq)
```

```
    est store model_3_`x'
```

```
    matrix table = r(table)
```

```
    matrix list table
```

```
    putexcel M3=(_b[`x'sps]) using "MarR1.xlsx", sheet("`x'") modify
```

```
    putexcel M4=(table[5,1]) using "MarR1.xlsx", sheet("`x'") modify
```

```
    putexcel O4=(table[6,1]) using "MarR1.xlsx", sheet("`x'") modify
```

```
xtreg hba1c `x'sps typfam typfrd typchd age income work bmi depress phyact smoke [pw=weight], fe  
i(idauniq)
```

```
    est store model_4_`x'
```

```
    matrix table = r(table)
```

```
    matrix list table
```

```
putexcel R3=(_b[`x'sps]) using "MarR1.xlsx", sheet("`x") modify
putexcel R4=(table[5,1]) using "MarR1.xlsx", sheet("`x") modify
putexcel T4=(table[6,1]) using "MarR1.xlsx", sheet("`x") modify
}

preserve
keep if typsps==1
local func = "sup str"
foreach x of local func {
xtreg hba1c `x'sps age, fe i(idauniq)
    est store model_1_`x'
    matrix table = r(table)
    matrix list table
    putexcel C3=(_b[`x'sps]) using "MarR1.xlsx", sheet("`x") modify
    putexcel C4=(table[5,1]) using "MarR1.xlsx", sheet("`x") modify
    putexcel E4=(table[6,1]) using "MarR1.xlsx", sheet("`x") modify
xtreg hba1c `x'sps age income work bmi depress phyact smoke, fe i(idauniq)
    est store model_2_`x'
    matrix table = r(table)
    matrix list table
    putexcel H3=(_b[`x'sps]) using "MarR1.xlsx", sheet("`x") modify
    putexcel H4=(table[5,1]) using "MarR1.xlsx", sheet("`x") modify
    putexcel J4=(table[6,1]) using "MarR1.xlsx", sheet("`x") modify
xtreg hba1c `x'sps `x'fam `x'frd `x'chd age income work bmi depress phyact smoke, fe i(idauniq)
    est store model_3_`x'
    matrix table = r(table)
    matrix list table
    putexcel M3=(_b[`x'sps]) using "MarR1.xlsx", sheet("`x") modify
    putexcel M4=(table[5,1]) using "MarR1.xlsx", sheet("`x") modify
```

```
putexcel O4=(table[6,1]) using "MarR1.xlsx", sheet("`x'") modify
xtreg hba1c `x'sps `x'fam `x'frd `x'chd age income work bmi depress phyact smoke [pw=weight], fe
i(idauniq)

est store model_4_`x'
matrix table = r(table)
matrix list table
putexcel R3=(_b[`x'sps]) using "MarR1.xlsx", sheet("`x'") modify
putexcel R4=(table[5,1]) using "MarR1.xlsx", sheet("`x'") modify
putexcel T4=(table[6,1]) using "MarR1.xlsx", sheet("`x'") modify
}

restore
```
